# Supplementary material
Source: ML conference proceedings conference paper supplement (https://proceedings.neurips.cc/paper_files/paper/2019/hash/b49fdab097253cac48e3dc628a49da5e-Abstract.html)
Supplement: Supplementary file [file b49fdab097253cac48e3dc628a49da5e-Supplemental.zip]

## Supplementary material

### A Practical considerations with hardware

**Reference design.** On the OPU system described in Figure 1, the DMD only lets us encode and randomly project binary signals. Therefore, all pairwise differences  $(\mathbf{x}_q - \mathbf{x}_r)$  between the columns of  $\mathbf{X} \in \mathbb{R}^{N \times Q}$  must be binary. To design reference signals we first collect all frames  $\{\boldsymbol{\xi}_s\}_{s=1}^S$  and sum them  $\sum_{s=1}^S \boldsymbol{\xi}_s$ . The first reference  $\mathbf{r}_1$  is initialized to ones at the indices where  $\sum_{s=1}^S \boldsymbol{\xi}_s$  is nonzero. Next, some of  $\mathbf{r}_1$ 's zero-valued entries are flipped to one with probability  $\alpha$ . A similar process is used for all subsequent references. In general, a reference  $\mathbf{r}_q$  is initialized by assigning ones to the nonzero support of  $(\sum_{s=1}^S \boldsymbol{\xi}_s + \sum_{k=1}^{q-1} \mathbf{r}_k)$  and then flipping some of its zero entries with probability  $\alpha$ .

There is a tradeoff between large and small  $\alpha$ . If  $\alpha$  is too large, a reference may become all-ones before all subsequent references are generated. On the other hand if  $\alpha$  is too small,  $\mathbf{r}_{q+1} - \mathbf{r}_q$  will have many zeros and so  $|\mathbf{A}(\mathbf{r}_{q+1} - \mathbf{r}_q)|^2$  may not be high enough to be detected by the camera sensor. The consequence of this tradeoff is that in practice the number of anchors is limited. Furthermore, in general a larger  $N$  makes it easier to make  $K$  good anchors as  $\alpha$  can be larger which keeps  $|\mathbf{A}(\mathbf{r}_{q+1} - \mathbf{r}_q)|^2$  away from the sensitivity threshold.

Figure 5 shows binary references reshaped into squares which were used for the linearity experiment on the OPU in Figure 2c. Here,  $N = 64^2$  and  $\alpha = 0.2$ . The number on top of each reference is the difference in the number of ones between itself and the previously generated reference.

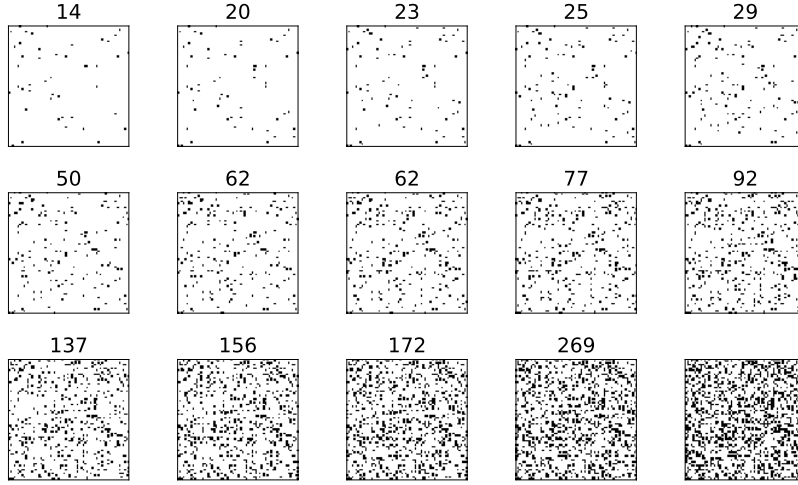

Figure 5: Binary references reshaped into squares which were used for the linearity experiment on the OPU in Figure 2c. Here  $N = 64^2$  and  $\alpha = 0.2$ . The number on top of each anchor is the difference in the number of ones between itself and the previously generated reference.

**Minimum attainable measurement.** To determine the sensitivity threshold,  $\tau$ , we randomly project an all-zero signal a few times and record the output. The minimum, mode or mean of these measurements can be taken to be the minimum that can be measured. Once  $\tau$  is estimated, we apply a mask and zero any measurements which are equal to or less than the minimum.

**Camera sensor saturation.** It is possible for the signal reaching the camera to saturate the sensor. In a  $b$ -bit system we can detect this if many measurements are equal to  $2^b - 1$ . In all experiments we ensure that there is no saturation by adjusting the camera exposure. This again involves a tradeoff: if exposure is too high, we saturate the sensor; if it is too low, measurements may be too small to be detected and we are not exploiting the full dynamic range.

## B Randomized singular value decomposition (RSVD) details

Algorithm 2 is the prototype randomized SVD algorithm given by [8]. To implement this on hardware we replace Step 1 and 2 to formulate Algorithm 3. As  $\mathbf{A}$  in Algorithm 3 has iid entries following a standard complex Gaussian, calculating  $\mathbf{P}$  in Algorithm 3 is the same as doing step 2 in Algorithm 2. We only need to do half the number of projections because we use an iid complex random matrix. The real and imaginary parts are two random projections.

---

**Algorithm 2** Prototype randomized SVD algorithm [8].

---

**Input:** Matrix,  $\mathbf{B} \in \mathbb{R}^{M \times N}$  whose SVD is required, a target number of  $K$  singular vectors

**Output:** The SVD  $\mathbf{U}$ ,  $\mathbf{\Sigma}$  and  $\mathbf{V}^*$

- 1: Generate an  $N \times 2K$  random Gaussian matrix  $\mathbf{A}$ .
  - 2: Form  $\mathbf{Y} = \mathbf{B}\mathbf{A}$ .
  - 3: Construct a matrix  $\mathbf{Q}$  whose columns form an orthonormal basis for the range of  $\mathbf{Y}$ .
  - 4: Form  $\mathbf{C} = \mathbf{Q}^* \mathbf{B}$ .
  - 5: Compute the SVD of the smaller  $\mathbf{C} = \tilde{\mathbf{U}} \mathbf{\Sigma} \mathbf{V}^*$ .
  - 6:  $\mathbf{U} = \mathbf{Q} \tilde{\mathbf{U}}$ .
- 

---

**Algorithm 3** Randomized SVD algorithm on the OPU.

---

**Input:** Matrix,  $\mathbf{B} \in \mathbb{R}^{M \times N}$  whose SVD is required, a target number of  $K$  singular vectors

**Output:** The SVD  $\mathbf{U}$ ,  $\mathbf{\Sigma}$  and  $\mathbf{V}^*$

- 1: Solve  $|\mathbf{Y}|^2 = |\mathbf{A}\mathbf{B}^*|^2$  by treating each column of  $\mathbf{B}^*$  as a frame and using Algorithm 1, where  $\mathbf{A} \in \mathbb{C}^{K \times N}$  is as in the MPR problem and has  $K$  rows.
  - 2: Horizontally stack the real and imaginary parts of  $\mathbf{Y}^* \in \mathbb{C}^{M \times K}$  as  $\mathbf{P} = [\text{Re}(\mathbf{Y}^*) \quad \text{Im}(\mathbf{Y}^*)] \in \mathbb{R}^{M \times 2K}$ .
  - 3: Construct a matrix  $\mathbf{Q}$  whose columns form an orthonormal basis for the range of  $\mathbf{P}$ .
  - 4: Form  $\mathbf{C} = \mathbf{Q}^* \mathbf{B}$ .
  - 5: Compute the SVD of the smaller  $\mathbf{C} = \tilde{\mathbf{U}} \mathbf{\Sigma} \mathbf{V}^*$ .
  - 6:  $\mathbf{U} = \mathbf{Q} \tilde{\mathbf{U}}$ .
- 

## C Localization with known anchor positions

If we have perfect knowledge of the anchor locations in the complex plane, we do not need to localize them for each frame  $s$ . The localization problem then boils down to multilateration, which can be formulated by minimizing the square-range-based least squares (SR-LS) objective [2],

$$\hat{\mathbf{v}}_1 = \min_{\mathbf{v}_1} \sum_{q=2}^Q \left( \|\mathbf{v}_1 - \mathbf{v}_q\|_2^2 - d_q^2 \right)^2 \quad (9)$$

where  $\mathbf{v}_1$  and  $\mathbf{v}_q$  are as defined in Section 2.3 and  $d_q$  is the noisy measured distance. There exists efficient algorithms which solve (9) to global optimality [2], as well as suboptimal solutions based on solving a small linear system [22].
